# Supplementary material for: METTL3 enhances pancreatic ductal adenocarcinoma progression and gemcitabine resistance through modifying DDX23 mRNA N6 adenosine methylation
Source: PubMed Central journal article supplement (PMC10050319; doi:10.1038/s41419-023-05715-1), 2023-03-28

p-PI3K

p-AKT

sh-NC

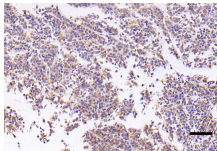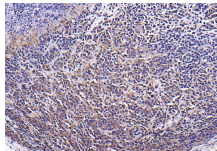

sh-DDX23

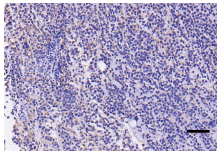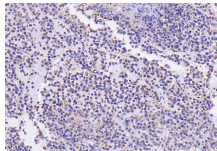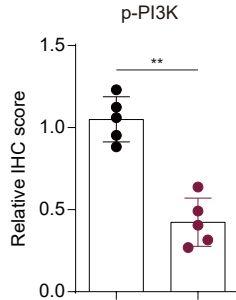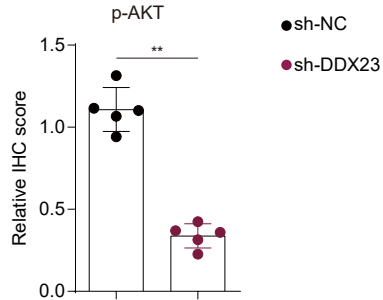

Supplement: 41419_2023_5715_MOESM8_ESM.pdf [file 41419_2023_5715_MOESM8_ESM.pdf]
